# Supplementary material for: Basal ganglia engagement during REM sleep movements in Parkinson’s disease
Source: PubMed Central journal article supplement (PMC9468156; doi:10.1038/s41531-022-00382-z), 2022-09-12
Supplement: 41531_2022_382_MOESM1_ESM.pdf [file 41531_2022_382_MOESM1_ESM.pdf]

**Title:**

Basal Ganglia Engagement during REM Sleep Movements in Parkinson's Disease

**Running Head:**

GPi Activity during REM Sleep and Awake Movements

**Author list:**

Ajay K. Verma<sup>1\*</sup>, Sergio Francisco Acosta Lenis<sup>1\*</sup>, Joshua E. Aman<sup>1</sup>, David Escobar Sanabria<sup>1</sup>,  
Jing Wang<sup>1</sup>, Amy Pearson<sup>1</sup>, Meghan Hill<sup>1</sup>, Remi Patriat<sup>2</sup>, Lauren E. Schrock<sup>1</sup>, Scott E. Cooper<sup>1</sup>,  
Michael C. Park<sup>1,3</sup>, Noam Harel<sup>2,3</sup>, Michael J. Howell<sup>1</sup>, Colum D. MacKinnon<sup>1</sup>, Jerrold L. Vitek<sup>1</sup>,  
Luke A. Johnson<sup>1†</sup>

\*These authors contributed equally

<sup>1</sup> Department of Neurology, University of Minnesota, Minneapolis, Minnesota, USA

<sup>2</sup> Department of Radiology, University of Minnesota, Minneapolis, Minnesota, USA

<sup>3</sup> Department of Neurosurgery, University of Minnesota, Minneapolis, Minnesota, USA

***†Corresponding Author:***

Luke A. Johnson, PhD

Department of Neurology, University of Minnesota

Lions Research Building 410

2001 6th St SE

Minneapolis, MN 55455

Email: joh03032@umn.edu

Minneapolis, MN 55455

+1 314-479-6700

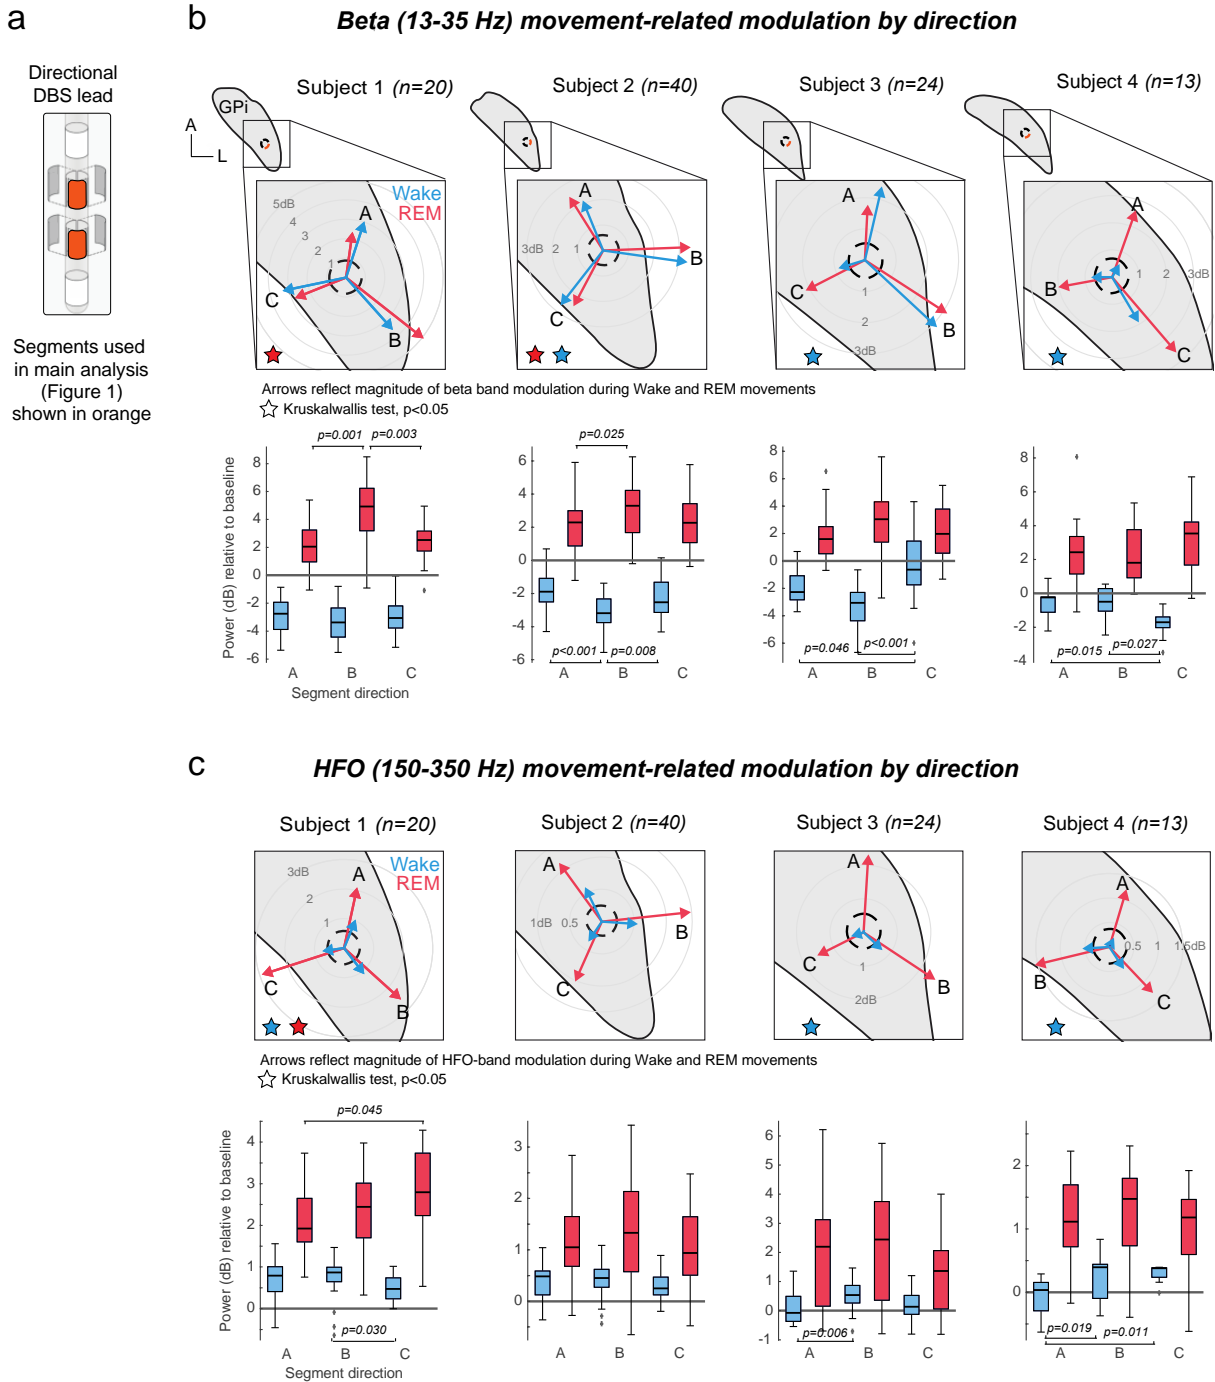

**Supplementary Figure 1. GPi DBS recording locations and movement-related beta and high-frequency power modulation by direction.**

**(a)** Schematic of an Abbott directional “1–3–3–1” lead, illustrating in orange that bipolar paired recordings from vertically adjacent segments were used in this study. **(b)** DBS lead implant

locations for each patient, estimated from preoperative MRI and postoperative CT scans. Axial reconstructions are shown, with recording segment used in primary analysis (**Figure 1**, Results section) shown in orange, chosen based on the segment direction with largest movement-related modulation of beta band activity (see Methods). Recordings were made in right GPi in patients 1-3 and in left GPi in patient 4; left GPi images were mirrored for visualization. Subject 3 was implanted with a Boston Scientific directional lead (see Methods) which has alternative contact labeling compared to Abbott, however for visualization in this figure, directions were assigned A, B and C labels. Distributions (lower panels) and median magnitude (upper panels) of beta band modulation in each direction are presented. To determine statistically significant directionality of oscillatory activity, the Kruskal-Wallis test was performed separately on wake and REM sleep datasets to determine if distributions in the three directions come from the same distribution ( $p < 0.05$ ), followed by pairwise tests correcting for multiple comparisons. Analogous plots but for high-frequency band power modulations are shown in **(c)**. Boxplot elements: center line, median; box limits, upper and lower quartiles; whiskers, 1.5xinterquartile range; +sign, outliers.
